# Supplementary material for: HERV-W ENV Induces Innate Immune Activation and Neuronal Apoptosis via linc01930/cGAS Axis in Recent-Onset Schizophrenia
Source: MDPI journal article supplement (doi:10.3390/ijms24033000), 2023-02-03
Supplement: s1 [file s1]

**Supplementary Table S1.**

Comparison of demographic and clinical characteristics between Schizophrenia and Healthy controls in Chinese (yellow race)

| characteristics      | Recent-onset<br>schizophrenia<br>(n=21) | Healthy controls<br>(n=26) | P value |
|----------------------|-----------------------------------------|----------------------------|---------|
| Age(year)            | 44.0±12.32                              | 42.46±10.28                | 0.708   |
| Education(year)      | 10.00±3.62                              | 10.65±3.82                 | 0.665   |
| BMI(body mass index) | 21.06±2.74                              | 20.56±3.96                 | 0.460   |
| Gender(male/female)  | 8/13                                    | 10/16                      | 0.980   |
| Smokers              | 6(28.6%)                                | 7(26.9%)                   | 0.9     |

All values are means ± SDs unless otherwise indicated. Age, Education and BMI were calculated by the Mann-Whitney U test. Gender and Smokers were calculated by the chi-square test.

**Supplementary Table S2**

PCR primer for plasmid construction

| plasmid                       | Oilgo sequence(5'>3')              |
|-------------------------------|------------------------------------|
| pcDNA3.1-linc01930            | F-CCGGAATTCCTCCAAAAGTGGAACAATTCA   |
|                               | R-CGCGGATCCTTGCTGTTTAAATCATATTT    |
| pGL3-Basic-linc01930-promoter | F-CGGGGTACCGAAAAAGTTCCACTTCACCAC   |
|                               | R-CCCAAGCTTCTATTAAGAATAATGCTGCT    |
| pXJ40-HA-HERV-W-ENV           | F-CCGGAATTCGCCACCATGGCCCTCCCTTATC  |
|                               | R-CCCAAGCTTCTAACTGCTTCCTGCTGAAT    |
| pENTER-N-FLAG-cGAS            | F-CGGGGTACCATGCAGCCTTGGCACGGAAAGGC |
|                               | R-CCCAAGCTTAAATTCATCAAAAAGTGGAAACT |

**Supplementary Table S3.**

Primer sequence for qRT-PCR

| Target gene | Oilgo sequence(5'>3') | Length ( bp ) |
|-------------|-----------------------|---------------|
|-------------|-----------------------|---------------|

|                    |                              |     |
|--------------------|------------------------------|-----|
| Human-U6           | F-CTCGCTTCGGCAGCACA          | 96  |
|                    | R-AACGCTTCACGAATTTGCGT       |     |
| Human-RPS14        | F-GTGTGACTGGTGGGATGAAGGTAA   | 127 |
|                    | R-AGTTTGATGTGTAGGGCGGTGAT    |     |
| Human-linc01930    | F-GTATGACTTTATAGCCGTGA       | 130 |
|                    | R-CTTAAACTGACGACCCTGA        |     |
| Human-ENV          | F-CCATGCCGCTGTATGACCAG       | 109 |
|                    | R-GGGTTCCTTAGAAAGACTCCT      |     |
| Human-cGAS         | F-GGGAGCCCTGCTGTAACACTTCTTAT | 187 |
|                    | R-CCTTTGCATGCTTGGGTACAAGGT   |     |
| Human-STING        | F-ACTGTGGGGTGCCTGATAAC       | 198 |
|                    | R-TGGCAAACAAAGTCTGCAAG       |     |
| Human-IFN- $\beta$ | F-GCTTGGATTCTACAAAGAAGCA     | 166 |
|                    | R-ATAGATGGTCAATGCGGCGTC      |     |
| Human-GAPDH        | F-ATGACATCAAGAAGGTGGTG       | 177 |
|                    | R-CATACCAGGAAATGAGCTTG       |     |
| Mouse-cGAS         | F-CAGGAAGGAACCGGACAAGC       | 134 |
|                    | R-CCGACTCCCGTTTCTGCATT       |     |
| Mouse-STING        | F-GCCCCAGCAAAACATCGAC        | 187 |
|                    | R-CTGCTCAAGCCGATCCTCC        |     |
| Mouse-IFN- $\beta$ | F-GCCCTCTCCATCAACTATAAGCA    | 123 |
|                    | R-GATCTTGAAGTCCGCCCTGT       |     |
| Mouse-GAPDH        | F-GCATCTTCTTGTGCAGTGCC       | 105 |
|                    | R-GAGAAGGCAGCCCTGGTAAC       |     |

**Supplementary Table S4.**

Antibodies and dilution

| Antibody | brand | catalog | dilution |
|----------|-------|---------|----------|
|----------|-------|---------|----------|

|         |          |         |              |
|---------|----------|---------|--------------|
| ERVW-1  | ABclonal | A16522  | 1:1000 (WB)  |
| cGAS    | ABclonal | A8335   | 1:1000 (WB)  |
| STING   | ABclonal | A3262   | 1:1000 (WB)  |
| IFNB1   | ABclonal | A1575   | 1:1000 (WB)  |
| P-IRF3  | Abcam    | AB76493 | 1:1000 (WB)  |
| GAPDH   | ABclonal | AC002   | 1:10000 (WB) |
| GFP-Tag | ABclonal | AE012   | 1:10000 (WB) |
| IgG-HRP | ABclonal | AS003   | 1:5000 (WB)  |
| IgG-HRP | ABclonal | AS014   | 1:5000 (WB)  |
| IgG-HRP | ABclonal | AS061   | 1:5000 (WB)  |

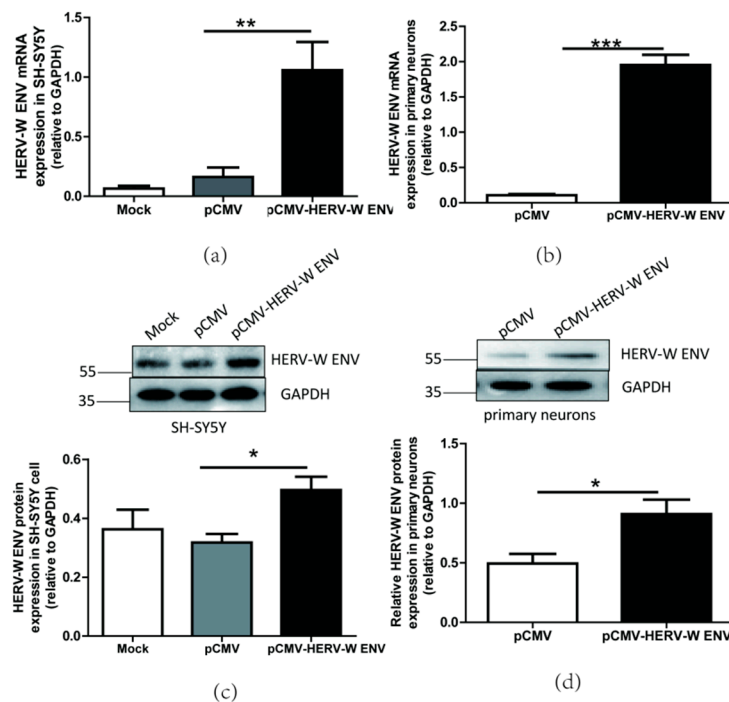

**Supplementary Figure S1.** Transfection efficiency of HERV-W ENV in neuronal cells. (a, b) The HERV-W ENV mRNA levels in HERV-W ENV transfected SH-SY5Y cells and primary neurons using qRT-PCR. (c, d) The HERV-W ENV protein levels in HERV-W ENV transfected SH-SY5Y cells and primary neurons using western blotting. Statistical analysis was performed by one-way analysis of variance (ANOVA). \* $P < 0.05$ ; \*\* $P < 0.01$ .

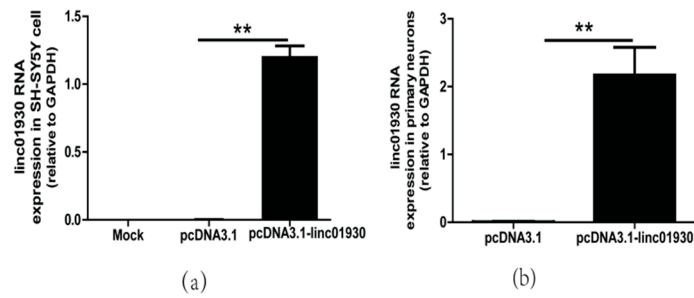

**Supplementary Figure S2.** Transfection efficiency of linc01930 in neuronal cells. (a) The linc01930 RNA levels in linc01930 transfected SH-SY5Y cells using qRT-PCR. (b) The linc01930 RNA levels in linc01930 transfected primary neurons using qRT-PCR. Statistical analysis was performed by one-way analysis of variance (ANOVA). \* $P < 0.05$ ; \*\* $P < 0.01$ .

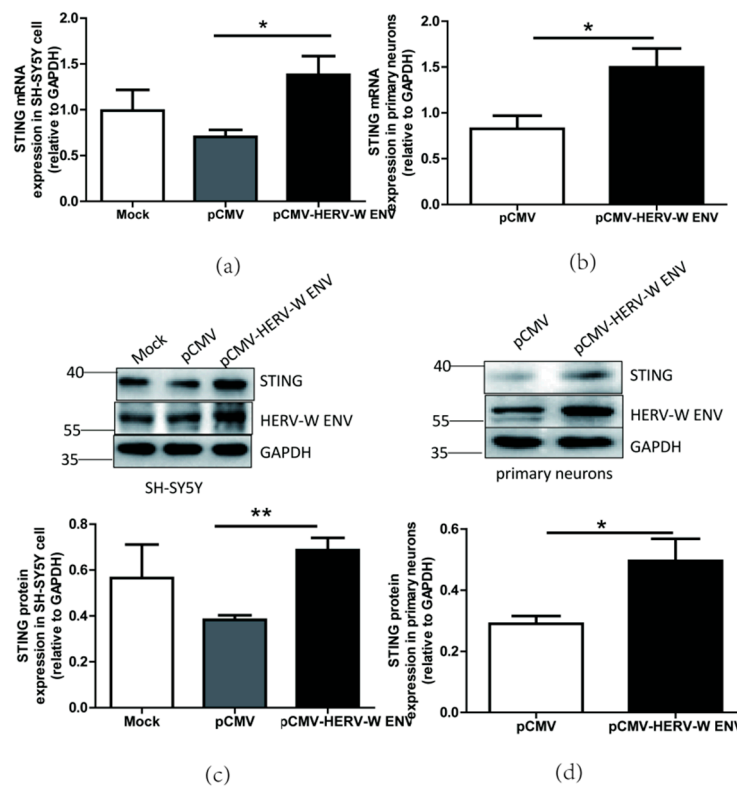

**Supplementary Figure S3.** HERV-W ENV activated STING expression in neuronal cells. (a, b) Respectively STING mRNA levels in HERV-W ENV transfected SH-SY5Y cells and primary neurons using qRT-PCR. (c, d) Respectively represent STING protein expression in HERV-W ENV transfected SH-SY5Y cell and primary neurons using western blotting. Statistical analysis was performed by one-way analysis of variance (ANOVA). \* $P < 0.05$ ; \*\* $P < 0.01$ .

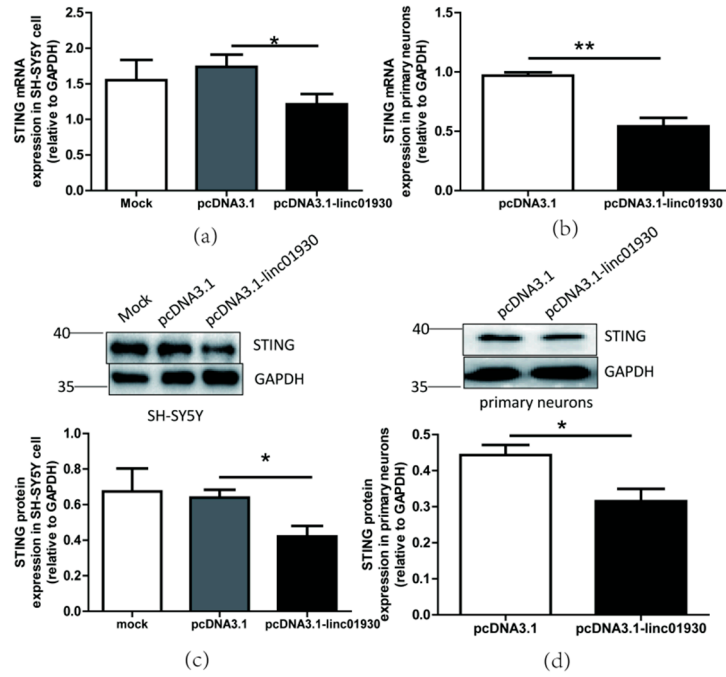

**Supplementary Figure S4.** Linc01930 inhibited STING expression in neuronal cells. (a, b) Respectively STING mRNA levels in linc01930 transfected SH-SY5Y cells and primary neurons using qRT-PCR. (c, d) Respectively represent STING protein expression in linc01930 transfected SH-SY5Y cell and primary neurons using western blotting. Statistical analysis was performed by one-way analysis of variance (ANOVA). \* $P < 0.05$ ; \*\* $P < 0.01$ .

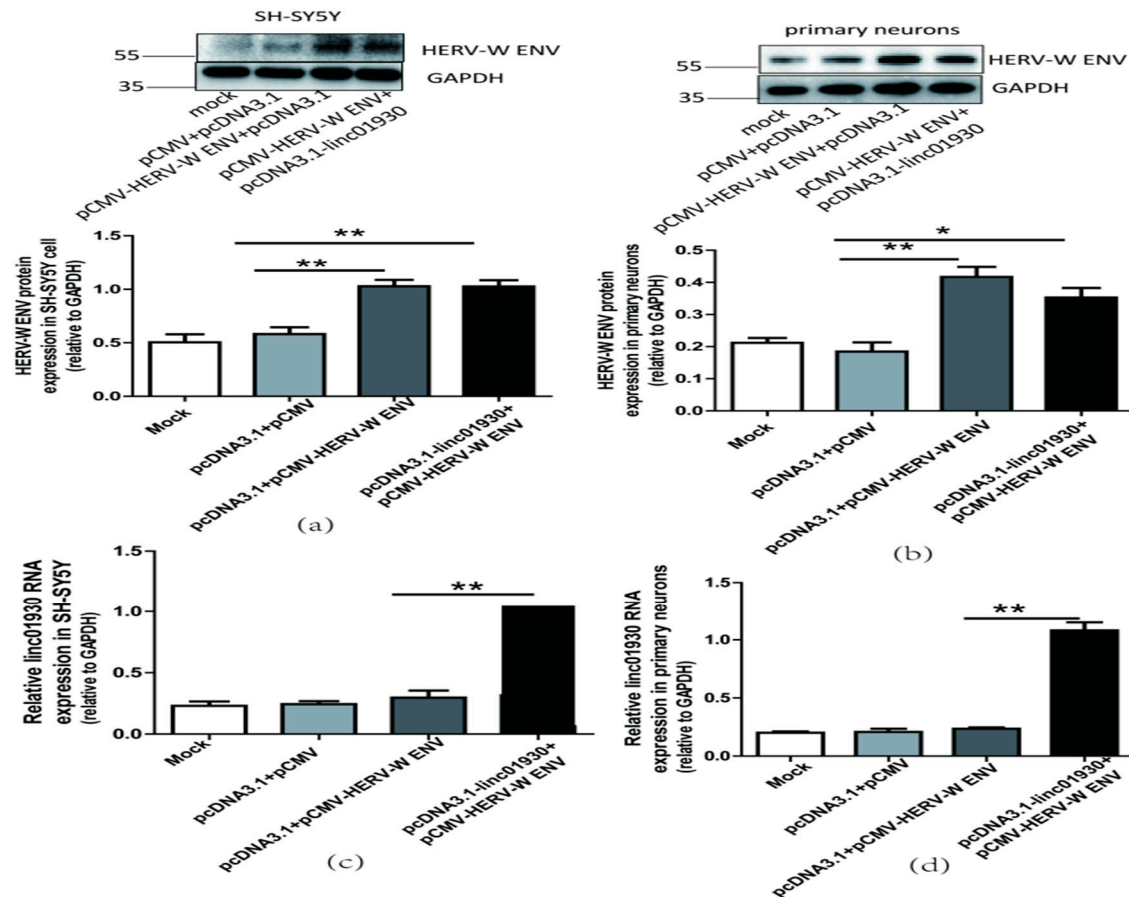

**Supplementary Figure S5.** Expression levels of HERV-W ENV and linc01930 in co-transfected neuronal cells. (a, b) Respectively representative western blots for HERV-W ENV in SH-SY5Y cell and primary neurons after co-transfected with linc01930 and HERV-W ENV. (c, d) Respectively representative linc01930 RNA levels in SH-SY5Y cell and primary neurons after co-transfected with linc01930 and HERV-W ENV. Statistical analysis was performed by one-way analysis of variance (ANOVA). \* $P < 0.05$ ; \*\* $P < 0.01$ .

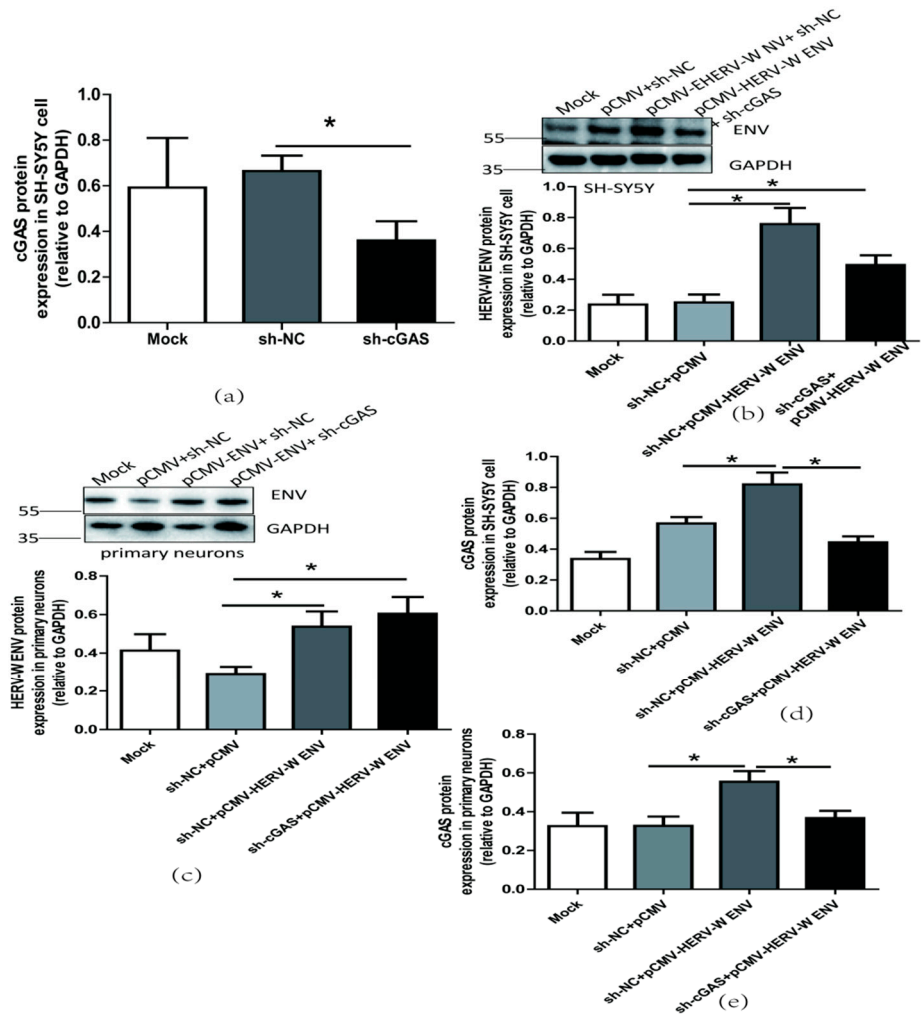

**Supplementary Figure S6.** Expression levels of HERV-W ENV and cGAS in co-transfected neuronal cells. (a) Representative western blots for cGAS in SH-SY5Y cells after cGAS knockdown. (b, c) Respectively representative western blots for HERV-W ENV in SH-SY5Y cells and primary neurons after co-transfected with sh-cGAS and HERV-W ENV. (d, e) Respectively representative western blots for cGAS in SH-SY5Y cell and primary neurons after co-transfected with sh-cGAS and HERV-W ENV. Statistical analysis was performed by one-way analysis of variance (ANOVA). \* $P < 0.05$ .
